# Supplementary material
Source: Springer Nature journal article supplement (https://www.springermedizin.de/resource/supplementary/12957_2009_621_MOESM3_ESM.pdf/9565352)

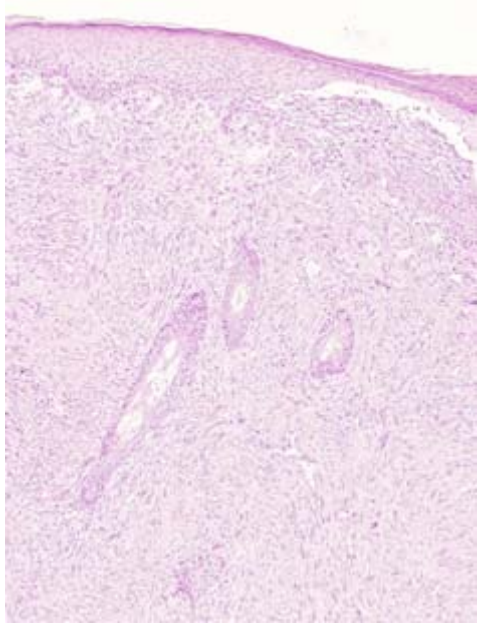

(a)

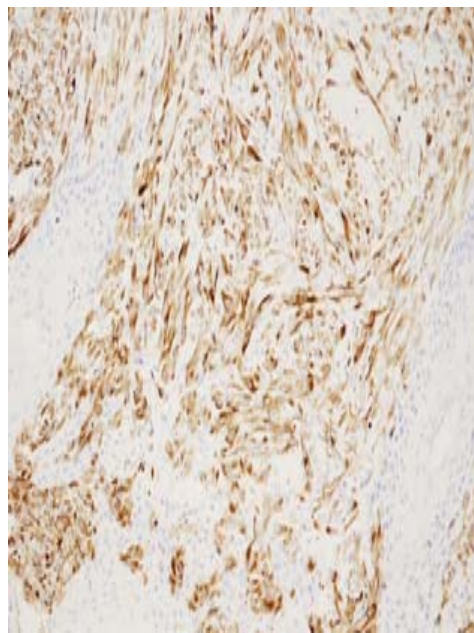

(b)

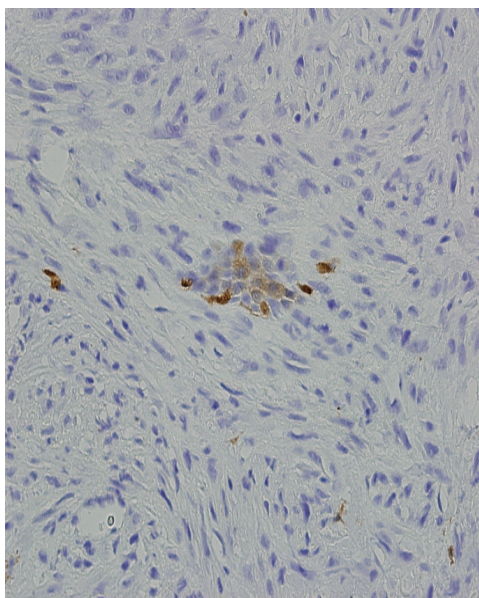

(c)

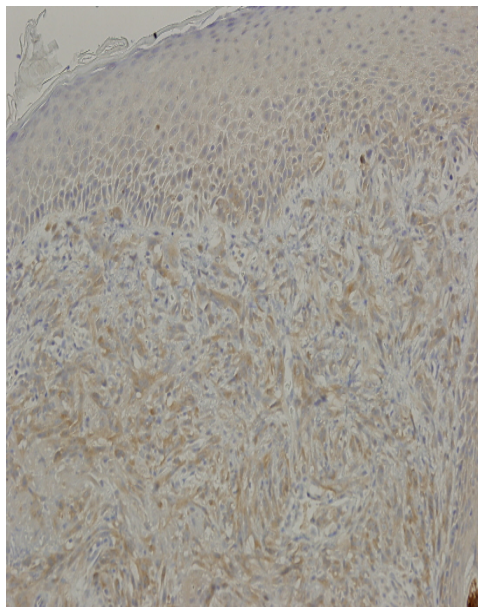

(d)

Supplement: MOESM3 [file 9565352]
